# Supplementary material for: Exploring aerosol–cloud interactions in liquid-phase clouds over eastern China and its adjacent ocean using the WRF-Chem–SBM model
Source: Copernicus journal article supplement (doi:10.5194/acp-24-9101-2024), 2024-08-22
Supplement: Supplementary file 1 [file acp-24-9101-2024-supplement.pdf]

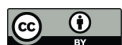

*Supplement of*

## **Exploring aerosol–cloud interactions in liquid-phase clouds over eastern China and its adjacent ocean using the WRF-Chem–SBM model**

**Jianqi Zhao et al.**

*Correspondence to:* Xiaoyan Ma ([xma@nuist.edu.cn](mailto:xma@nuist.edu.cn))

The copyright of individual parts of the supplement might differ from the article licence.

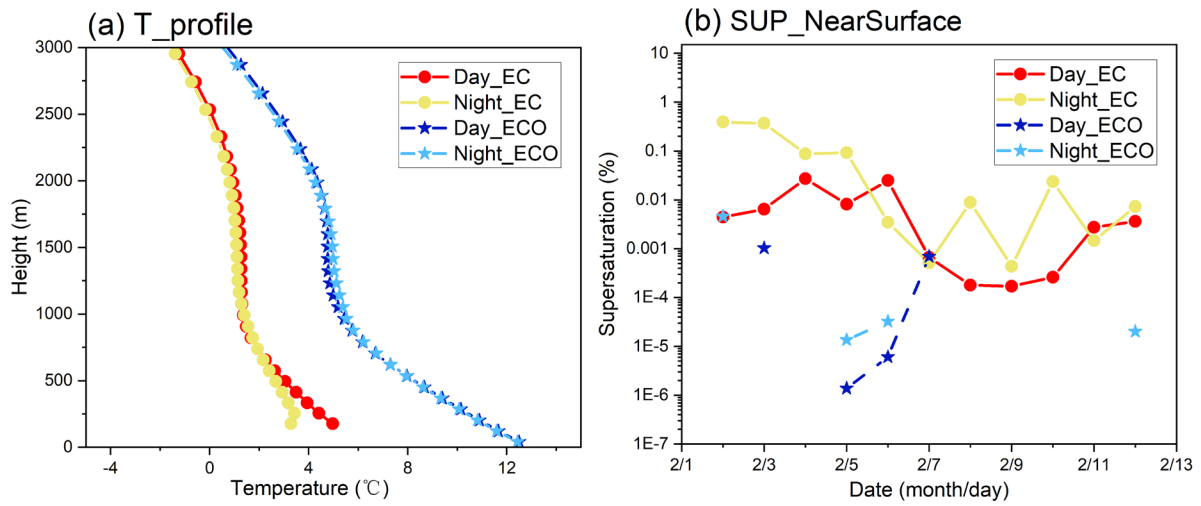

**Figure S1.** Diurnal variation of temperature profile (a, “Day” and “Night” refer to 7:00 to 18:00 and 19:00 to 06:00 of the next day in Beijing time respectively. The values in figure are averaged over all times of “Day” and “Night” period and grid points on each vertical layer) and near-surface supersaturation (b, the values in figure are averaged over all times and grid points on the near-surface layer during the “Day” and “Night” periods of each day)

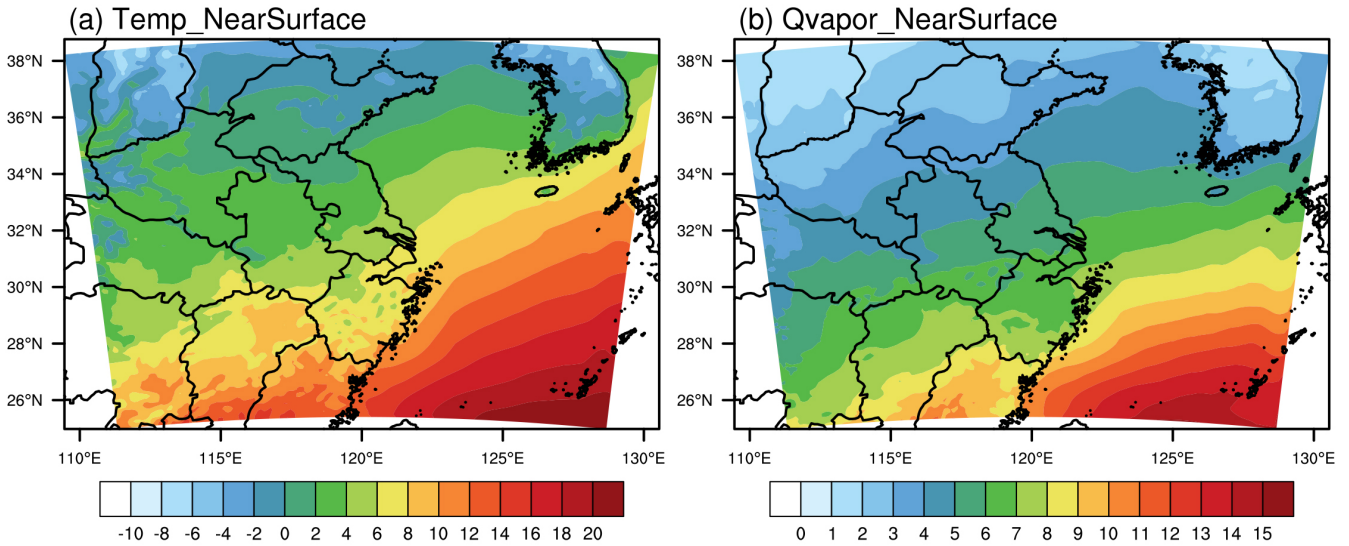

**Figure S2.** Average distributions of near-surface average temperature (unit: °C, a) and water vapor content (unit:  $\text{g}\cdot\text{m}^{-3}$ , b) during the simulation

**Supplement A.** namelist.input file of WRF-Chem-SBM (EC simulation)

```

&time_control
  run_days           = 0,
  run_hours          = 0,
  run_minutes        = 0,
  run_seconds        = 0,
  start_year         = 2019, 2019,
  start_month        = 02, 02,
  start_day          = 01, 01,
  start_hour         = 00, 00,
  start_minute       = 00, 00,
  start_second       = 00, 00,

```

```

end_year           = 2019, 2019,
end_month         = 02, 02,
end_day           = 13, 13,
end_hour          = 00, 00,
end_minute        = 00, 00,
end_second        = 00, 00,
interval_seconds  = 21600
input_from_file   = .true.,.true.,
history_interval  = 60, 60,
frames_per_outfile = 10000, 1000,
restart           = .false.,
restart_interval  = 99999999,
io_form_history   = 2
io_form_restart   = 2
io_form_input     = 2
io_form_boundary  = 2
io_form_auxinput5 = 2
auxinput5_interval = 60, 60,
io_form_auxinput6 = 2,
auxinput6_inname  = "wrfbiochemi_d0<domain>",
auxinput11_interval = 1, 1,
auxinput11_end_h  = 99999, 99999,
debug_level       = 10
/

&domains
time_step         = 60,
time_step_fract_num = 0,
time_step_fract_den = 1,
max_dom           = 2,
e_we              = 151, 160,
e_sn              = 125, 160,
e_vert            = 48, 48,
eta_levels        = 1.000, 0.990, 0.980, 0.970, 0.960, 0.950,
                  0.940, 0.930, 0.920, 0.910, 0.900, 0.890,
                  0.880, 0.870, 0.860, 0.850, 0.840, 0.830,
                  0.820, 0.810, 0.800, 0.790, 0.780, 0.770,
                  0.760, 0.740, 0.720, 0.700, 0.680, 0.660,
                  0.640, 0.620, 0.600, 0.570, 0.540, 0.510,
                  0.480, 0.450, 0.410, 0.370, 0.330, 0.290,
                  0.250, 0.200, 0.150, 0.100, 0.050, 0.000,

p_top_requested   = 5000,
num_metgrid_levels = 32,
num_metgrid_soil_levels = 4,
dx                = 12000, 4000,
dy                = 12000, 4000,
grid_id           = 1, 2,
parent_id         = 0, 1,

```

```

i_parent_start      = 1,    20,
j_parent_start      = 1,    30,
parent_grid_ratio    = 1,    3,
parent_time_step_ratio = 1,    3,
feedback            = 1,
smooth_option       = 0,
/

```

&physics

```

mp_physics          = 30,   30,
ra_lw_physics       = 4,    4,
ra_sw_physics       = 5,    5,
radt                = 12,   12,
sf_sfclay_physics  = 1,    1,
sf_surface_physics = 2,    2,
bl_pbl_physics      = 1,    1,
bldt                = 0,    0,
cu_physics           = 5,    5,
cudt                = 0,    0,
cugd_avedx          = 1,
cu_diag             = 1,    1,
icloud              = 1,
isfflx              = 1,
ifsnow              = 0,
mp_zero_out         = 2,
mp_zero_out_thresh = 1.e-12,
do_radar_ref        = 1,
surface_input_source = 1,
num_soil_layers     = 4,
cu_rad_feedback     = .true., .true.,
progn               = 1, 1,
sbm_mosaic_interact = 1,
/

```

&fdda

```

grid_fdda           = 1,   1,   1,   0,
gfdda_inname        = "wrffdda_d<domain>",
gfdda_end_h         = 312,  211,  720,
gfdda_interval_m    = 360,  360,  360,
fgdt                = 0,    0,    0,
if_no_pbl_nudging_uv = 0,    0,    0,
if_no_pbl_nudging_t = 1,    1,    1,
if_no_pbl_nudging_q = 1,    1,    1,
if_zfac_uv          = 0,    0,    0,
k_zfac_uv           = 10,   10,   10,
if_zfac_t           = 0,    0,    0,
k_zfac_t            = 10,   10,   10,
if_zfac_q           = 0,    0,    0,

```

```

k_zfac_q           = 10,   10,   10,
guv                = 0.0003, 0.0003, 0.0003,
gt                 = 0.0003, 0.0003, 0.0003,
gq                 = 0.0003, 0.0003, 0.0003,
if_ramping         = 1,
dtramp_min         = 60.0,
io_form_gfdda      = 2,
obs_nudge_opt      = 1,1,1,1,
max_obs            = 150000,
fdda_start         = 0., 0., 0., 0., 0.
fdda_end           = 99999., 99999., 99999., 99999., 99999.
obs_nudge_wind     = 1,1,1,1,1
obs_coef_wind      = 6.E-4,6.E-4,6.E-4,6.E-4,6.E-4
obs_nudge_temp     = 1,1,1,1,1
obs_coef_temp      = 6.E-4,6.E-4,6.E-4,6.E-4,6.E-4
obs_nudge_mois     = 1,1,1,1,1
obs_coef_mois      = 6.E-4,6.E-4,6.E-4,6.E-4,6.E-4
obs_rinxy          = 240.,240.,180.,180,180
obs_rinsig         = 0.1,
obs_twindo         = 0.6666667,0.6666667,0.6666667,0.6666667,0.6666667,
obs_npfi           = 10,
obs_ionf           = 2, 2, 2, 2, 2,
obs_idynin         = 0,
obs_dtramp         = 40.,
obs_prt_freq       = 10, 10, 10, 10, 10,
obs_prt_max        = 10
obs_ipf_errob      = .false.
obs_ipf_nudob      = .false.
obs_ipf_in4dob     = .false.
obs_ipf_init       = .false.

```

/

```

&dynamics
w_damping          = 1,
diff_opt           = 1,   1,   1,
km_opt             = 4,   4,   4,
diff_6th_opt       = 0,   0,   0,
diff_6th_factor    = 0.12, 0.12, 0.12,
base_temp          = 290.
damp_opt           = 0,
zdamp              = 5000., 5000., 5000.,
dampcoef           = 0.2, 0.2, 0.2
khdif              = 0,   0,   0,
kvdif              = 0,   0,   0,
non_hydrostatic    = .true., .true., .true.,
chem_adv_opt       = 2,   2,   2,   2,
moist_adv_opt      = 2,   2,   1,
scalar_adv_opt     = 2,   2,   1,

```

|                    |                             |     |    |    |
|--------------------|-----------------------------|-----|----|----|
| tke_adv_opt        | = 2,                        | 2,  | 2, | 2, |
| gwd_opt            | = 0,                        |     |    |    |
| /                  |                             |     |    |    |
| &bdy_control       |                             |     |    |    |
| spec_bdy_width     | = 10,                       |     |    |    |
| spec_zone          | = 1,                        |     |    |    |
| relax_zone         | = 9,                        |     |    |    |
| spec_exp           | = 0.33,                     |     |    |    |
| specified          | = .true., .false., .false., |     |    |    |
| nested             | = .false., .true., .true.,  |     |    |    |
| /                  |                             |     |    |    |
| &chem              |                             |     |    |    |
| kemit              | = 1,                        |     |    |    |
| chem_opt           | = 9,                        | 9,  |    |    |
| bio_emiss_opt      | = 3,                        | 3,  |    |    |
| bioemdt            | = 30,                       | 30, |    |    |
| photdt             | = 30,                       | 30, |    |    |
| chemdt             | = 0,                        | 0,  |    |    |
| io_style_emissions | = 1,                        |     |    |    |
| emiss_inpt_opt     | = 1,                        | 1,  |    |    |
| emiss_opt          | = 3,                        | 3,  |    |    |
| chem_in_opt        | = 1,                        | 1,  |    |    |
| phot_opt           | = 2,                        | 2,  |    |    |
| gas_drydep_opt     | = 1,                        | 1,  |    |    |
| aer_drydep_opt     | = 1,                        | 1,  |    |    |
| dust_opt           | = 13,                       |     |    |    |
| dmsemis_opt        | = 0,                        |     |    |    |
| seas_opt           | = 2,                        |     |    |    |
| gas_bc_opt         | = 1,                        | 1,  |    |    |
| gas_ic_opt         | = 1,                        | 1,  |    |    |
| aer_bc_opt         | = 1,                        | 1,  |    |    |
| aer_ic_opt         | = 1,                        | 1,  |    |    |
| gaschem_onoff      | = 1,                        | 1,  |    |    |
| aerchem_onoff      | = 1,                        | 1,  |    |    |
| wetscav_onoff      | = 1,                        | 1,  |    |    |
| cldchem_onoff      | = 1,                        | 1,  |    |    |
| vertmix_onoff      | = 1,                        | 1,  |    |    |
| chem_conv_tr       | = 1,                        | 1,  |    |    |
| biomass_burn_opt   | = 1,                        | 1,  |    |    |
| plumerisefire_frq  | = 0,                        | 0,  |    |    |
| aer_ra_feedback    | = 1,                        | 1,  |    |    |
| aer_op_opt         | = 4,                        | 4,  |    |    |
| have_bcs_chem      | = .true., .true.,           |     |    |    |
| have_bcs_tracer    | = .true., .true.,           |     |    |    |
| opt_pars_out       | = 1,                        |     |    |    |
| ne_area            | = 1000,                     |     |    |    |

/

&grib2

/

&namelist\_quilt

nio\_tasks\_per\_group = 0,

nio\_groups = 1,

/
